# Supplementary material
Source: publisher figshare collection journal article supplement (https://geolsoc.figshare.com/articles/dataset/_/3454127)
Supplement: Supplementary file 1 [file 1]

Archive with 7 entries (7 files):
- 18886_2015-021_1.pdf
- 18886_2015-021_2.pdf
- 18886_2015-021_3.pdf
- 18886_2015-021_4.pdf
- 18886_2015-021_5.pdf
- 18886_2015-021_6.pdf
- 18886_2015-021_7.pdf
