# Supplementary material
Source: publisher figshare collection journal article supplement (https://geolsoc.figshare.com/articles/dataset/_/3454127)
Supplement: Supplementary file 1 [file 1 › 18886_2015-021_2.pdf]

## SUPPLEMENTARY FILE 2. DS AFT DATA

| Sample   | Area              | Mineral | Irradiation | No. grains | Std track density x10000cm-2 | ps x10000 cm-2 | pi x10000 cm-2 | px2  | Age (Ma) | ±2σ  |
|----------|-------------------|---------|-------------|------------|------------------------------|----------------|----------------|------|----------|------|
|          |                   |         |             |            | (counted)                    | (counted)      | (counted)      |      |          |      |
| Kawau 1A | Great South Basin | zircon  | eth-38      | 15         | 17 (1907)                    | 1900 (2510)    | 205 (271)      | 30   | 260      | 36   |
| Pukaki 1 | Great South Basin | zircon  | eth-38      | 11         | 16.6 (1907)                  | 1038 (498)     | 385 (185)      | <1   | 70       | 20   |
| Tara 1   | Great South Basin | zircon  | eth-38      | 14         | 16.8 (1907)                  | 102 (1204)     | 38.2 (453)     | 11   | 75       | 11   |
| R06180   | Bounty Islands    | zircon  | eth-13      | 9          | 14.2 (1360)                  | 849 (703)      | 220 (182)      | 61   | 92       | 17   |
| R10721   | Bounty Islands    | zircon  | eth-25      | 3          | 15.5 (2109)                  | 1851 (553)     | 409 (122)      | 66   | 117      | 25   |
| R06182   | Bounty Islands    | zircon  | eth-22      | 11         | 12.9 (1090)                  | 1457 (2232)    | 269 (412)      | 31   | 117      | 26   |
| R10730   | Bounty Islands    | zircon  | eth-22      | 8          | 13.7 (1090)                  | 1455 (849)     | 298 (174)      | 89   | 112      | 21   |
| R10731   | Bounty Islands    | zircon  | eth-25      | 11         | 15.6 (2109)                  | 1323 (1534)    | 345 (400)      | 99   | 100      | 13   |
| R10721   | Bounty Islands    | apatite | eth-24      | 8          | 97.9 (3103)                  | 220 (1028)     | 471 (2205)     | 23   | 81       | 7    |
| R10730   | Bounty Islands    | apatite | eth-24      | 6          | 94.7 (3103)                  | 142 (348)      | 307 (753)      | 48   | 78       | 11   |
| Pukaki 1 | Great South Basin | apatite | eth-28      | 10         | 135 (2510)                   | 13.6 (82)      | 189 (1138)     | 2.1  | 16       | 4    |
| Pukaki 1 | Great South Basin | apatite | eth-28      | 8          | 136 (2510)                   | 13.6 (77)      | 213 (1202)     | 6.7  | 15       | 4    |
| Pakaha 1 | Great South Basin | apatite | eth-35      | 20         | 123 (3493)                   | 3.2 (40)       | 408 (5086)     | 51   | 1.7      | 0.6  |
| P80687   | Chathams          | apatite | VUW011-21   | 20         | 11.78 (2350)                 | 13.07 (400)    | 33.03 (1011)   | 2.23 | 79.8     | 13.6 |

All ages determined with external detector and a geometry factor of 2.

Samples irradiated at the ANSTO facility, Lucas Heights, Australia except P80687 at Oregon State University reactor facility

Ages calculated using the zeta approach (Hurford & Green 1983)

Zeta = 338±5 for zircon and dosimeter glass NBS612. For apatite and dosimeter glass CNS zeta = 355±5.

Errors calculated according to Green (1981) expressed at the 2σ level

ps and pi represent spontaneous and induced track densities

P(χ<sup>2</sup>) is the probability of obtaining χ<sup>2</sup> for v degrees of freedom where v=no of crystals -1

Central age calculated when p(χ<sup>2</sup>) <5%.

λD = 1.55125 x 10<sup>-10</sup>
