# Supplementary material
Source: publisher figshare collection journal article supplement (https://geolsoc.figshare.com/articles/dataset/_/3454127)
Supplement: Supplementary file 1 [file 1 › 18886_2015-021_3.pdf]

### SUPPLEMENTARY FILE 3. BK apatite fission track data.

| Sample        | No. of grains | Fossil track density<br>[10 <sup>6</sup> cm <sup>-2</sup> ] | <sup>a</sup> Average U<br>[ppm] | <sup>b</sup> P( $\chi^2$ )<br>[%] | <sup>c</sup> Age <i>pooled U</i><br>[Ma $\pm 1\sigma$ ] | Central age<br>[Ma $\pm 1\sigma$ ] | Mean track length<br>[ $\mu\text{m} \pm 1\text{se}$ ] | Std dev. | Dpar [ $\mu\text{m} \pm 1$<br>std dev.] | Std. Dev. |
|---------------|---------------|-------------------------------------------------------------|---------------------------------|-----------------------------------|---------------------------------------------------------|------------------------------------|-------------------------------------------------------|----------|-----------------------------------------|-----------|
| <b>R6865</b>  | 27            | 3.510 (4024)                                                | 58.1                            | 51.37                             | <b>163.5 <math>\pm</math> 17.6</b>                      | <b>178.5 <math>\pm</math> 16.8</b> | 12.01 $\pm$ 0.16 (101)                                | 1.61     | 1.49 (166)                              | 0.18      |
| <b>P80920</b> | 3             | 1.177 (97)                                                  | 16.9                            | 18.62                             | <b>125.3 <math>\pm</math> 29.3</b>                      | <b>132.8 <math>\pm</math> 19.8</b> | -                                                     | -        | -                                       | -         |
| <b>R23636</b> | 8             | 0.217 (109)                                                 | 46.1                            | 12.74                             | <b>9.7 <math>\pm</math> 1.6</b>                         | <b>9.3 <math>\pm</math> 1.6</b>    | -                                                     | -        | -                                       | -         |

Nos. in brackets are no. of tracks counted, track lengths measured or Dpars measured.

<sup>a</sup> <sup>238</sup>U= average uranium content of all grains measured by LA-ICP-MS.

<sup>b</sup> P( $\chi^2$ ) = probability of  $\chi^2$  for (n-1) degrees of freedom (Galbraith, 1981).

<sup>c</sup> Age pooled U = Pooled mean AFT grain ages calculated from individual fossil track content and <sup>238</sup>U content measured by LA-ICP-MS.
