# Supplementary material
Source: publisher figshare collection journal article supplement (https://geolsoc.figshare.com/articles/dataset/_/3454127)
Supplement: Supplementary file 1 [file 1 › 18886_2015-021_4.pdf]

**SUPPLEMENTARY FILE 4. (U-Th-Sm)/He apatite data (single grain) - BK Zealandia**

| Sample No.                              | Lab. no. | He no. | <sup>4</sup> He (ncc) | Mass (mg) | U ppm | Th ppm | Sm ppm | Th/U ratio | <sup>a</sup> [eU] ppm | <sup>b</sup> Mean F <sub>r</sub> | Age (Ma)      | Error (±1σ) | Grain radius (μm) | Grain length (μm) | <sup>c</sup> R <sub>s</sub> | <sup>d</sup> Grain morphology |
|-----------------------------------------|----------|--------|-----------------------|-----------|-------|--------|--------|------------|-----------------------|----------------------------------|---------------|-------------|-------------------|-------------------|-----------------------------|-------------------------------|
| <b>Wishbone Ridge</b>                   |          |        |                       |           |       |        |        |            |                       |                                  |               |             |                   |                   |                             |                               |
| P67415                                  | 6432     | 18815  | 0.368                 | 0.0164    | 0.9   | 2.7    | 141.1  | 2.99       | 1.5                   | 0.82                             | <b>111.9</b>  | <b>8.8</b>  | 75.6              | 396.3             | 95.3                        | 1T                            |
| P67415                                  | 6433     | 18812  | 0.294                 | 0.0102    | 1.2   | 3.4    | 151.8  | 2.79       | 2.0                   | 0.78                             | <b>106.6</b>  | <b>8.5</b>  | 68.8              | 259.1             | 81.5                        | 2T                            |
| P67415                                  | 6434     | 18809  | 0.268                 | 0.0078    | 1.4   | 3.8    | 159.8  | 2.65       | 2.3                   | 0.76                             | <b>112.4</b>  | <b>9.3</b>  | 65.8              | 217.8             | 75.8                        | 2T                            |
|                                         |          |        |                       |           |       |        |        |            |                       |                                  | <b>*110.0</b> | <b>10.0</b> |                   |                   |                             |                               |
| <b>Takahe Seamount, E. Chatham Rise</b> |          |        |                       |           |       |        |        |            |                       |                                  |               |             |                   |                   |                             |                               |
| P67437                                  | 8515     | 25519  | 0.278                 | 0.0027    | 4.6   | 29.2   | 350.0  | 6.40       | 11.5                  | 0.66                             | <b>107.3</b>  | <b>4.4</b>  | 48.4              | 139.6             | 53.9                        | 2T                            |
| P67437                                  | 8516     | 25521  | 0.312                 | 0.0027    | 7.0   | 35.0   | 474.2  | 5.00       | 15.2                  | 0.64                             | <b>95.6</b>   | <b>3.8</b>  | 41.6              | 184.9             | 50.9                        | 2T                            |
|                                         |          |        |                       |           |       |        |        |            |                       |                                  | <b>100.6</b>  | <b>5.8</b>  |                   |                   |                             |                               |
| <b>South Island, Murihiku</b>           |          |        |                       |           |       |        |        |            |                       |                                  |               |             |                   |                   |                             |                               |
| P80920                                  | 7463     | 22030  | 8.648                 | 0.00805   | 14.4  | 14.2   | 293.6  | 0.99       | 17.7                  | 0.77                             | <b>468.3</b>  | <b>29.0</b> | 70.3              | 196.0             | 77.6                        | 2T                            |
| P80920                                  | 7464     | 22052  | 8.249                 | 0.00956   | 11.9  | 126.0  | 479.2  | 10.59      | 41.5                  | 0.79                             | <b>166.9</b>  | <b>10.4</b> | 69.3              | 285.8             | 83.6                        | 1T                            |
| P80920                                  | 7465     | 22054  | 3.099                 | 0.00337   | 14.1  | 8.0    | 392.6  | 0.56       | 16.0                  | 0.70                             | <b>439.6</b>  | <b>27.3</b> | 42.2              | 255.7             | 54.3                        | 1T                            |
| <b>Bounty Islands</b>                   |          |        |                       |           |       |        |        |            |                       |                                  |               |             |                   |                   |                             |                               |
| 10721                                   | 7580     | 22446  | 1.740                 | 0.0031    | 36.3  | 34.7   | 590.5  | 0.95       | 44.5                  | 0.67                             | <b>101.8</b>  | <b>6.3</b>  | 41.7              | 240.8             | 53.3                        | 1T                            |
| 10721                                   | 7581     | 22444  | 1.547                 | 0.0039    | 27.5  | 16.3   | 336.9  | 0.59       | 31.3                  | 0.73                             | <b>102.6</b>  | <b>6.4</b>  | 50.0              | 154.2             | 56.6                        | 0T                            |
| 10721                                   | 7460     | 22046  | 13.370                | 0.0065    | 15.8  | 26.4   | 330.9  | 1.67       | 22.0                  | 0.76                             | <b>*710.3</b> | <b>44.0</b> | 55.2              | 211.8             | 65.7                        | 0T                            |
| 10721                                   | 7461     | 22034  | 9.031                 | 0.0033    | 55.0  | 22.1   | 512.6  | 0.40       | 60.2                  | 0.71                             | <b>*352.9</b> | <b>21.9</b> | 45.2              | 226.8             | 56.6                        | 1T                            |
| 10721                                   | 7462     | 22032  | 1.419                 | 0.0050    | 14.5  | 25.2   | 387.9  | 1.74       | 20.4                  | 0.74                             | <b>109.9</b>  | <b>6.8</b>  | 52.8              | 179.4             | 61.2                        | 0T                            |
|                                         |          |        |                       |           |       |        |        |            |                       |                                  | <b>*104.5</b> | <b>7.3</b>  |                   |                   |                             |                               |
| <b>Campbell Plateau</b>                 |          |        |                       |           |       |        |        |            |                       |                                  |               |             |                   |                   |                             |                               |
| R6865                                   | 6430     | 18821  | 61.010                | 0.0189    | 117.2 | 193.2  | 642.4  | 1.65       | 162.6                 | 0.84                             | <b>160.3</b>  | <b>11.9</b> | 87.5              | 371.8             | 106.3                       | 1T                            |
| R6865                                   | 6827     | 20017  | 55.384                | 0.0194    | 100.1 | 146.4  | 448.0  | 1.46       | 134.5                 | 0.81                             | <b>171.1</b>  | <b>10.6</b> | 77.3              | 443.0             | 98.7                        | 1T                            |
| R6865                                   | 6828     | 20019  | 39.967                | 0.0058    | 191.3 | 288.0  | 718.6  | 1.51       | 259.0                 | 0.68                             | <b>215.4</b>  | <b>13.4</b> | 50.8              | 269.1             | 64.1                        | 2T                            |
| R6865                                   | 6829     | 20021  | 53.104                | 0.0110    | 142.4 | 149.8  | 438.9  | 1.05       | 177.6                 | 0.75                             | <b>218.9</b>  | <b>13.6</b> | 56.8              | 338.7             | 73.0                        | 0T                            |

<sup>a</sup>Effective uranium concentration (U ppm + 0.235 Th ppm).

<sup>b</sup>F<sub>r</sub> is the α-ejection correction after Farley et al. (1996).

<sup>c</sup>R<sub>s</sub> is the equivalent sphere radius of the crystal.

<sup>d</sup>Grain morphology - 0T = no terminations, 1T = one termination, 2T = 2 terminations.

<sup>e</sup>Weighted mean at the 95% confidence level (calculated using Isoplot by K. Ludwig.)

<sup>f</sup>Analysis excluded from calculation of weighted mean.
