# Supplementary material
Source: publisher figshare collection journal article supplement (https://geolsoc.figshare.com/articles/dataset/_/3454127)
Supplement: Supplementary file 1 [file 1 › 18886_2015-021_5.pdf]

**SUPPLEMENTARY FILE 5. BK Single grain zircon (U-Th)/He data - Zealandia**

| Sample No.             | Lab. no. | He no. | <sup>4</sup> He (ncc) | Mass (mg) | U ppm  | Th ppm | Th/U | <sup>a</sup> [eU] ppm | <sup>b</sup> Mean F <sub>T</sub> | Age (Ma)                 | Error ±1σ (Ma) | Grain length (μm) | Grain width (μm) |
|------------------------|----------|--------|-----------------------|-----------|--------|--------|------|-----------------------|----------------------------------|--------------------------|----------------|-------------------|------------------|
| <b>Chatham Rise</b>    |          |        |                       |           |        |        |      |                       |                                  |                          |                |                   |                  |
| P67437                 | 8594     | 25855  | 16.661                | 0.0093    | 118.4  | 92.7   | 0.78 | 140.2                 | 0.80                             | <b>103.9</b>             | <b>6.4</b>     | 251.0             | 107.7            |
| P67437                 | 8595     | 25849  | 10.741                | 0.0060    | 126.5  | 78.5   | 0.62 | 145.0                 | 0.77                             | <b>101.0</b>             | <b>6.3</b>     | 225.8             | 89.5             |
| P67437                 | 8596     | 25846  | 10.184                | 0.0074    | 104.3  | 62.9   | 0.60 | 119.1                 | 0.79                             | <b>93.8</b>              | <b>5.8</b>     | 233.0             | 99.8             |
|                        |          |        |                       |           |        |        |      |                       |                                  | <b><sup>c</sup>99.2</b>  | <b>7.0</b>     |                   |                  |
| <b>Chatham Islands</b> |          |        |                       |           |        |        |      |                       |                                  |                          |                |                   |                  |
| P80686                 | 8588     | 25816  | 19.021                | 0.0053    | 204.1  | 159.6  | 0.78 | 241.6                 | 0.77                             | <b>122.0</b>             | <b>7.6</b>     | 181.5             | 102.9            |
| P80686                 | 8589     | 25819  | 47.473                | 0.0081    | 330.7  | 132.1  | 0.40 | 361.8                 | 0.80                             | <b>132.2</b>             | <b>8.2</b>     | 223.5             | 110.0            |
| P80686                 | 8668     | 26084  | 62.232                | 0.0085    | 440.7  | 181.0  | 0.41 | 483.3                 | 0.82                             | <b>111.5</b>             | <b>6.9</b>     | 212.5             | 131.6            |
|                        |          |        |                       |           |        |        |      |                       |                                  | <b><sup>c</sup>121.0</b> | <b>26.0</b>    |                   |                  |
| P80687                 | 8591     | 25822  | 126.211               | 0.0116    | 732.6  | 149.6  | 0.20 | 767.8                 | 0.82                             | <b>115.5</b>             | <b>7.1</b>     | 257.7             | 121.2            |
| P80687                 | 8593     | 25834  | 26.790                | 0.0073    | 275.3  | 107.3  | 0.39 | 300.5                 | 0.79                             | <b>99.3</b>              | <b>6.1</b>     | 218.9             | 105.1            |
| P80687                 | 8669     | 26081  | 64.730                | 0.0048    | 783.5  | 437.2  | 0.56 | 886.2                 | 0.79                             | <b>124.0</b>             | <b>7.7</b>     | 236.9             | 99.2             |
|                        |          |        |                       |           |        |        |      |                       |                                  | <b><sup>c</sup>111.0</b> | <b>32.0</b>    |                   |                  |
| P40482                 | 8597     | 25843  | 107.356               | 0.0063    | 871.4  | 463.6  | 0.53 | 980.3                 | 0.78                             | <b>141.0</b>             | <b>8.7</b>     | 207.5             | 100.5            |
| P40482                 | 8598     | 25838  | 77.821                | 0.0095    | 400.4  | 119.6  | 0.30 | 428.5                 | 0.81                             | <b>154.8</b>             | <b>9.6</b>     | 243.4             | 112.6            |
| P40482                 | 8599     | 25836  | 65.393                | 0.0063    | 1202.4 | 2798.1 | 2.33 | 1860.0                | 0.78                             | <b>45.5</b>              | <b>2.8</b>     | 198.4             | 105.9            |
| P40482                 | 8708     | 26211  | 91.234                | 0.0066    | 513.2  | 377.0  | 0.73 | 601.8                 | 0.79                             | <b>186.3</b>             | <b>11.5</b>    | 186.3             | 119.2            |
| P40482                 | 8709     | 26214  | 50.450                | 0.0087    | 194.2  | 102.1  | 0.53 | 218.2                 | 0.81                             | <b>212.3</b>             | <b>13.1</b>    | 212.9             | 124.1            |
| P82333                 | 8608     | 25868  | 34.063                | 0.0045    | 388.3  | 220.8  | 0.57 | 440.2                 | 0.76                             | <b>138.7</b>             | <b>8.6</b>     | 192.5             | 86.8             |
| P82333                 | 8609     | 25876  | 20.472                | 0.0047    | 221.1  | 132.1  | 0.60 | 252.1                 | 0.77                             | <b>141.1</b>             | <b>8.7</b>     | 174.7             | 98.9             |
| P82333                 | 8610     | 25879  | 47.984                | 0.0082    | 241.1  | 191.0  | 0.79 | 286.0                 | 0.80                             | <b>166.6</b>             | <b>10.3</b>    | 202.8             | 125.4            |
| P82316                 | 8603     | 25806  | 46.174                | 0.0109    | 261.8  | 138.8  | 0.53 | 294.4                 | 0.81                             | <b>116.9</b>             | <b>7.2</b>     | 264.9             | 113.5            |
| P82316                 | 8604     | 25808  | 61.019                | 0.0076    | 390.0  | 218.0  | 0.56 | 441.2                 | 0.80                             | <b><sup>d</sup>146.9</b> | <b>9.1</b>     | 219.6             | 107.9            |
| P82316                 | 8605     | 25810  | 5.983                 | 0.0039    | 107.2  | 74.9   | 0.70 | 124.8                 | 0.75                             | <b>100.5</b>             | <b>6.2</b>     | 165.2             | 92.4             |
|                        |          |        |                       |           |        |        |      |                       |                                  | <b>107.5</b>             | <b>9.4</b>     |                   |                  |
| R23285                 | 8228     | 24165  | 27.448                | 0.0039    | 468.2  | 408.5  | 0.87 | 564.2                 | 0.75                             | <b>102.9</b>             | <b>6.4</b>     | 156.7             | 98.9             |
| R23285                 | 8229     | 24175  | 32.723                | 0.0056    | 377.8  | 284.4  | 0.75 | 444.6                 | 0.77                             | <b>108.1</b>             | <b>6.7</b>     | 207.5             | 92.7             |
| R23285                 | 8230     | 24177  | 17.542                | 0.0052    | 234.8  | 73.7   | 0.31 | 252.1                 | 0.77                             | <b>109.1</b>             | <b>6.8</b>     | 199.1             | 92.0             |
|                        |          |        |                       |           |        |        |      |                       |                                  | <b><sup>c</sup>106.6</b> | <b>7.5</b>     |                   |                  |
| <b>Bounty Islands</b>  |          |        |                       |           |        |        |      |                       |                                  |                          |                |                   |                  |
| R6182                  | 8611     | 25901  | 80.902                | 0.0111    | 421.3  | 170.1  | 0.40 | 461.3                 | 0.80                             | <b>128.6</b>             | <b>8.0</b>     | 317.0             | 98.6             |
| R6182                  | 8612     | 25894  | 215.004               | 0.0053    | 2104.0 | 809.1  | 0.38 | 2294.1                | 0.77                             | <b>143.4</b>             | <b>8.9</b>     | 205.8             | 90.2             |
| R6182                  | 8613     | 25891  | 57.967                | 0.0045    | 297.6  | 201.5  | 0.68 | 345.0                 | 0.76                             | <b><sup>d</sup>298.1</b> | <b>18.5</b>    | 191.4             | 87.0             |
| R6182                  | 8710     | 26217  | 139.884               | 0.0063    | 996.1  | 841.1  | 0.84 | 1193.8                | 0.77                             | <b>151.6</b>             | <b>9.4</b>     | 237.9             | 88.1             |
|                        |          |        |                       |           |        |        |      |                       |                                  | <b><sup>c</sup>140.0</b> | <b>29.0</b>    |                   |                  |
| R10721                 | 8226     | 24161  | 259.096               | 0.0082    | 1729.1 | 751.7  | 0.43 | 1905.8                | 0.80                             | <b>134.5</b>             | <b>8.3</b>     | 243.4             | 102.2            |
| R10721                 | 8227     | 24163  | 48.494                | 0.0049    | 508.3  | 292.7  | 0.58 | 577.0                 | 0.76                             | <b>138.6</b>             | <b>8.6</b>     | 206.8             | 85.6             |
| R10721                 | 8225     | 24159  | 46.584                | 0.0061    | 297.8  | 196.2  | 0.66 | 343.9                 | 0.76                             | <b><sup>d</sup>179.6</b> | <b>11.1</b>    | 251.1             | 82.7             |
| R10721                 | 8614     | 25889  | 56.295                | 0.0051    | 686.8  | 262.0  | 0.38 | 748.3                 | 0.77                             | <b>119.8</b>             | <b>7.4</b>     | 192.8             | 93.9             |
| R10721                 | 8615     | 25887  | 219.589               | 0.0067    | 1610.8 | 520.8  | 0.32 | 1733.2                | 0.78                             | <b>152.7</b>             | <b>9.5</b>     | 233.1             | 93.7             |
| R10721                 | 8616     | 25881  | 61.455                | 0.0078    | 387.2  | 221.1  | 0.57 | 439.2                 | 0.79                             | <b>145.7</b>             | <b>9.0</b>     | 234.0             | 102.6            |
|                        |          |        |                       |           |        |        |      |                       |                                  | <b><sup>c</sup>136.0</b> | <b>16.0</b>    |                   |                  |
| <b>Solander Island</b> |          |        |                       |           |        |        |      |                       |                                  |                          |                |                   |                  |
| P79804                 | 8617     | 25904  | 29.622                | 0.0025    | 609.3  | 93.7   | 0.15 | 631.3                 | 0.70                             | <b><sup>d</sup>152.1</b> | <b>9.4</b>     | 174.3             | 65.1             |
| P79804                 | 8618     | 25909  | 15.440                | 0.0027    | 381.0  | 141.7  | 0.37 | 414.3                 | 0.72                             | <b>111.5</b>             | <b>6.9</b>     | 161.1             | 74.7             |
| P79804                 | 8619     | 25911  | 19.829                | 0.0018    | 931.8  | 124.7  | 0.13 | 961.1                 | 0.69                             | <b>92.8</b>              | <b>5.7</b>     | 138.7             | 65.4             |
|                        |          |        |                       |           |        |        |      |                       |                                  | <b>100.4</b>             | <b>8.8</b>     |                   |                  |
| <b>Campbell Island</b> |          |        |                       |           |        |        |      |                       |                                  |                          |                |                   |                  |
| R23627                 | 8600     | 25796  | 0.210                 | 0.0017    | 94.6   | 63.2   | 0.67 | 109.4                 | 0.68                             | <b>9.1</b>               | <b>0.6</b>     | 106.9             | 67.2             |
| R23627                 | 8601     | 25798  | 0.547                 | 0.0019    | 243.6  | 107.1  | 0.44 | 268.8                 | 0.70                             | <b>8.7</b>               | <b>0.5</b>     | 120.9             | 81.9             |
| R23627                 | 8602     | 25800  | 0.790                 | 0.0041    | 182.9  | 82.0   | 0.45 | 202.2                 | 0.74                             | <b>7.8</b>               | <b>0.5</b>     | 206.2             | 76.8             |
|                        |          |        |                       |           |        |        |      |                       |                                  | <b><sup>c</sup>8.5</b>   | <b>1.6</b>     |                   |                  |
| <b>Iselin Bank</b>     |          |        |                       |           |        |        |      |                       |                                  |                          |                |                   |                  |
| P50869                 | 8606     | 25860  | 46.554                | 0.0035    | 914.8  | 474.5  | 0.52 | 1026.3                | 0.72                             | <b>105.1</b>             | <b>6.5</b>     | 165.5             | 85.6             |
| P50869                 | 8607     | 25866  | 20.636                | 0.0031    | 522.9  | 233.6  | 0.45 | 577.8                 | 0.69                             | <b>94.0</b>              | <b>5.8</b>     | 195.7             | 67.4             |
|                        |          |        |                       |           |        |        |      |                       |                                  | <b>98.9</b>              | <b>8.7</b>     |                   |                  |

<sup>a</sup>Effective uranium concentration (U ppm + 0.235 Th ppm)

<sup>b</sup>F<sub>T</sub> is the α-ejection correction after Farley et al. (

<sup>c</sup>Weighted mean at the 95% confidence level (calculated using Isoplot by K. Ludwig.)

<sup>d</sup>Analysis excluded from calculation of weighted mean.
