# Supplementary material
Source: publisher figshare collection journal article supplement (https://geolsoc.figshare.com/articles/dataset/_/3454127)
Supplement: Supplementary file 1 [file 1 › 18886_2015-021_6.pdf]

**SUPPLEMENTARY FILE 6 TS Ar-Ar DATA****Tulloch-GNS, P75047, Muscovite, 3.28 mg, J = 0.001732 ± 0.24%**

4 amu discrimination = 1.0533 ± 1.41%, 40/39K = 0.04795 ± 48.28%, 36/37Ca = 0.000260 ± 6.87%, 39/37Ca = 0.000677 ± 5.05%

| step                                                                                            | T (C) | t (min.) | 36Ar  | 37Ar  | 38Ar  | 39Ar   | 40Ar    | %40Ar* | % 39Ar rlsd | Ca/K        | 40Ar*/39ArK | Age (Ma)        | 1s.d.  |      |
|-------------------------------------------------------------------------------------------------|-------|----------|-------|-------|-------|--------|---------|--------|-------------|-------------|-------------|-----------------|--------|------|
| 1                                                                                               | 750   | 12       | 0.346 | 0.235 | 0.208 | 9.523  | 391.499 | 75.9   | 2.3         | 0.14752459  | 31.277062   | 95.18           | 2.00   |      |
| 2                                                                                               | 800   | 12       | 1.998 | 0.150 | 0.570 | 13.393 | 1025.76 | 45.5   | 3.2         | 0.066953522 | 35.126447   | 106.55          | 3.40   |      |
| 3                                                                                               | 830   | 12       | 0.186 | 0.091 | 0.362 | 24.340 | 905.642 | 94.6   | 5.9         | 0.022349878 | 35.459592   | 107.53          | 1.92   |      |
| 4                                                                                               | 860   | 12       | 0.240 | 0.050 | 0.208 | 13.041 | 499.990 | 87.1   | 3.2         | 0.022919942 | 33.555537   | 101.92          | 1.94   |      |
| 5                                                                                               | 890   | 12       | 0.127 | 0.044 | 0.209 | 13.645 | 489.355 | 93.4   | 3.3         | 0.019276717 | 33.631735   | 102.14          | 1.92   |      |
| 6                                                                                               | 930   | 12       | 0.153 | 0.061 | 0.458 | 33.009 | 1144.10 | 96.5   | 8.0         | 0.011047153 | 33.730975   | 102.43          | 1.81   |      |
| 7                                                                                               | 970   | 12       | 0.162 | 0.091 | 0.735 | 55.741 | 1906.21 | 97.8   | 13.5        | 0.009759316 | 33.762817   | 102.53          | 1.80   |      |
| 8                                                                                               | 1010  | 12       | 0.135 | 0.127 | 0.666 | 49.485 | 1686.80 | 97.9   | 12.0        | 0.015342057 | 33.703877   | 102.35          | 1.79   |      |
| 9                                                                                               | 1060  | 12       | 0.137 | 0.235 | 0.579 | 43.658 | 1504.70 | 97.7   | 10.6        | 0.032178042 | 33.973894   | 103.15          | 1.81   |      |
| 10                                                                                              | 1110  | 12       | 0.135 | 0.425 | 0.557 | 39.925 | 1391.09 | 97.5   | 9.7         | 0.06363611  | 34.289799   | 104.08          | 1.84   |      |
| 11                                                                                              | 1160  | 12       | 0.127 | 0.810 | 0.593 | 42.985 | 1491.61 | 98.0   | 10.4        | 0.112650719 | 34.285053   | 104.07          | 1.82   |      |
| 12                                                                                              | 1210  | 12       | 0.132 | 0.994 | 0.741 | 54.704 | 1887.61 | 98.3   | 13.3        | 0.10862572  | 34.233182   | 103.92          | 1.81   |      |
| 13                                                                                              | 1270  | 12       | 0.138 | 1.459 | 0.234 | 15.245 | 553.050 | 94.3   | 3.7         | 0.572206103 | 34.239623   | 103.94          | 1.86   |      |
| 14                                                                                              | 1400  | 12       | 0.308 | 2.978 | 0.110 | 3.616  | 218.176 | 63.4   | 0.9         | 4.93034784  | 37.993127   | 114.97          | 2.81   |      |
| Cumulative %39Ar rlsd =                                                                         |       |          |       |       |       |        |         |        |             |             | 100.0       | Total gas age = | 103.45 | 1.03 |
| note: isotope beams in mV, rlsd = released, error in age includes J error, all errors 1 sigma   |       |          |       |       |       |        |         |        |             |             |             | Plateau age =   | 103.52 | 1.12 |
| (36Ar through 40Ar are measured beam intensities, corrected for decay for the age calculations) |       |          |       |       |       |        |         |        |             |             |             | (steps 2-13)    |        |      |
|                                                                                                 |       |          |       |       |       |        |         |        |             |             |             | No isochron     |        |      |

**Tulloch-GNS, P63138, Muscovite, 4.12 mg, J = 0.001711 ± 0.23%**

4 amu discrimination = 1.0533 ± 1.41%, 40/39K = 0.04795 ± 48.28%, 36/37Ca = 0.000260 ± 6.87%, 39/37Ca = 0.000677 ± 5.05%

| step                                                                                            | T (C) | t (min.) | 36Ar  | 37Ar  | 38Ar  | 39Ar    | 40Ar    | %40Ar* | % 39Ar rlsd | Ca/K            | 40Ar*/39ArK    | Age (Ma) | 1s.d. |      |
|-------------------------------------------------------------------------------------------------|-------|----------|-------|-------|-------|---------|---------|--------|-------------|-----------------|----------------|----------|-------|------|
| 1                                                                                               | 750   | 12       | 0.112 | 0.015 | 0.023 | 0.461   | 45.394  | 34.5   | 0.1         | 0.198530559     | 31.708072      | 95.31    | 4.13  |      |
| 2                                                                                               | 800   | 12       | 0.107 | 0.023 | 0.039 | 1.393   | 76.118  | 64.4   | 0.2         | 0.100739839     | 33.807320      | 101.45   | 2.55  |      |
| 3                                                                                               | 830   | 12       | 0.074 | 0.028 | 0.037 | 1.481   | 67.216  | 74.0   | 0.3         | 0.115353127     | 32.046630      | 96.30    | 2.11  |      |
| 4                                                                                               | 860   | 12       | 0.150 | 0.026 | 0.065 | 2.932   | 138.760 | 71.9   | 0.5         | 0.054103823     | 33.505815      | 100.57   | 2.24  |      |
| 5                                                                                               | 890   | 12       | 0.231 | 0.025 | 0.118 | 5.369   | 244.167 | 74.7   | 0.9         | 0.028409389     | 33.864896      | 101.62   | 2.16  |      |
| 6                                                                                               | 930   | 12       | 1.124 | 0.028 | 0.472 | 19.563  | 975.21  | 67.9   | 3.4         | 0.008732435     | 34.121314      | 102.37   | 2.33  |      |
| 7                                                                                               | 970   | 12       | 1.064 | 0.032 | 1.450 | 95.392  | 3443.23 | 91.3   | 16.8        | 0.00204668      | 33.333544      | 100.07   | 1.83  |      |
| 8                                                                                               | 1010  | 12       | 0.348 | 0.024 | 1.791 | 134.015 | 4478.45 | 97.8   | 23.6        | 0.001092621     | 33.050754      | 99.24    | 1.74  |      |
| 9                                                                                               | 1060  | 12       | 0.457 | 0.022 | 1.592 | 116.589 | 3951.70 | 96.7   | 20.5        | 0.001151269     | 33.158583      | 99.56    | 1.76  |      |
| 10                                                                                              | 1110  | 12       | 0.468 | 0.026 | 0.849 | 59.332  | 2072.42 | 93.8   | 10.5        | 0.0026736       | 33.086353      | 99.34    | 1.79  |      |
| 11                                                                                              | 1160  | 12       | 0.218 | 0.025 | 1.090 | 82.501  | 2763.62 | 97.9   | 14.5        | 0.001848812     | 33.131881      | 99.48    | 1.74  |      |
| 12                                                                                              | 1210  | 12       | 0.057 | 0.020 | 0.556 | 43.056  | 1425.16 | 99.3   | 7.6         | 0.002834055     | 33.121611      | 99.45    | 1.73  |      |
| 13                                                                                              | 1270  | 12       | 0.045 | 0.022 | 0.061 | 3.998   | 139.739 | 96.2   | 0.7         | 0.03357344      | 32.529678      | 97.72    | 1.76  |      |
| 14                                                                                              | 1400  | 12       | 0.045 | 0.017 | 0.030 | 1.672   | 67.533  | 99.8   | 0.3         | 0.062034349     | 34.328103      | 102.97   | 2.05  |      |
| Cumulative %39Ar rlsd =                                                                         |       |          |       |       |       |         |         |        | 100.0       | Total gas age = |                | 99.64    | 1.06  |      |
| note: isotope beams in mV, rlsd = released, error in age includes J error, all errors 1 sigma   |       |          |       |       |       |         |         |        |             |                 | Plateau age =  |          | 99.73 | 1.08 |
| (36Ar through 40Ar are measured beam intensities, corrected for decay for the age calculations) |       |          |       |       |       |         |         |        |             |                 | (steps 1-14)   |          |       |      |
|                                                                                                 |       |          |       |       |       |         |         |        |             |                 | Isochron age = |          | 99.50 | 0.75 |
|                                                                                                 |       |          |       |       |       |         |         |        |             |                 | (steps 1-13)   |          |       |      |

SUPPLEMENTARY DATA FILE 6 ctd

Tulloch-GNS, OU21581, K-spar, 9.66 mg, J = 0.001739 ± 0.24%  
4 amu discrimination = 1.0533 ± 1.41%, 40/39K = 0.04795 ± 48.28%, 36/37Ca = 0.000260 ± 6.87%, 39/37Ca = 0.000677 ± 5.05%

| step         | T (C)    | t (min.) | 36Ar  | 37Ar  | 38Ar   | 39Ar    | 40Ar    | %40Ar* | % 39Ar rlsd | Ca/K          | 40Ar*/39ArK | Age (Ma)    | 1s.d.       |
|--------------|----------|----------|-------|-------|--------|---------|---------|--------|-------------|---------------|-------------|-------------|-------------|
| 1            | 421.884  | 11       | 0.611 | 0.025 | 0.192  | 1.084   | 1090.64 | 84.9   | 0.090894989 | 0.135548088   | 863.3584057 | 1654.055    | 21.401      |
| 2            | 421.884  | 21       | 0.082 | 0.018 | 0.025  | 0.086   | 29.781  | 43.3   | 0.007211226 | 1.230542655   | 85.70124347 | 250.626     | 11.909      |
| 3            | 473.234  | 10       | 0.372 | 0.021 | 0.118  | 0.858   | 685.895 | 85.5   | 0.071944557 | 0.143851945   | 688.8125943 | 1420.67     | 19.391      |
| 4            | 473.234  | 20       | 0.075 | 0.017 | 0.019  | 0.164   | 30.05   | 58.1   | 0.01375164  | 0.609324023   | 62.05592063 | 184.882     | 7.733       |
| 5            | 524.584  | 9        | 0.249 | 0.027 | 0.101  | 1.623   | 859.652 | 92.6   | 0.136090929 | 0.097773933   | 494.3687874 | 1119.284    | 15.548      |
| 6            | 524.584  | 20       | 0.049 | 0.019 | 0.017  | 0.44    | 23.104  | 99.5   | 0.036894645 | 0.253804145   | 22.75010779 | 69.998      | 2.067       |
| 7            | 575.934  | 12       | 0.173 | 0.024 | 0.09   | 2.584   | 527.875 | 92.3   | 0.216672187 | 0.05458723    | 188.2701303 | 510.957     | 13.492      |
| 8            | 575.934  | 22       | 0.042 | 0.02  | 0.031  | 1.281   | 31.363  | 99.5   | 0.107413727 | 0.091760958   | 13.22964719 | 41.035      | 1.302       |
| 9            | 627.284  | 12       | 0.121 | 0.032 | 0.106  | 4.958   | 375.675 | 93     | 0.415735566 | 0.03793269    | 68.82689738 | 206.754     | 5.091       |
| 10           | 627.284  | 22       | 0.048 | 0.028 | 0.051  | 3.078   | 47.991  | 99.5   | 0.258094811 | 0.053464018   | 10.93007503 | 33.969      | 0.664       |
| 11           | 678.634  | 12       | 0.144 | 0.058 | 0.182  | 10.712  | 430.97  | 92.3   | 0.898216899 | 0.031821954   | 36.96908814 | 112.407     | 2.043       |
| 12           | 678.634  | 22       | 0.056 | 0.034 | 0.111  | 7.549   | 102.273 | 97.7   | 0.632994713 | 0.026470261   | 11.57419219 | 35.951      | 0.66        |
| 13           | 729.984  | 12       | 0.089 | 0.05  | 0.193  | 13.739  | 294.148 | 94     | 1.152035285 | 0.021388629   | 19.86731861 | 61.277      | 1.118       |
| 14           | 729.984  | 22       | 0.069 | 0.061 | 0.161  | 11.085  | 169.585 | 96.2   | 0.929493495 | 0.032341757   | 13.68176716 | 42.421      | 0.804       |
| 15           | 781.334  | 13       | 0.071 | 0.043 | 0.229  | 16.399  | 320.006 | 96.1   | 1.375080183 | 0.015410559   | 18.50434017 | 57.139      | 1.061       |
| 16           | 781.334  | 23       | 0.071 | 0.037 | 0.163  | 11.944  | 216.112 | 96.8   | 1.001521904 | 0.018206212   | 16.53425478 | 51.141      | 0.921       |
| 17           | 822.414  | 19       | 0.086 | 0.047 | 0.197  | 13.51   | 265.836 | 95.8   | 1.132833299 | 0.020446099   | 18.18825213 | 56.178      | 1.015       |
| 18           | 842.954  | 19       | 0.071 | 0.036 | 0.155  | 10.799  | 239.83  | 97.2   | 0.905511976 | 0.019592362   | 20.72464929 | 63.875      | 1.144       |
| 19           | 884.034  | 19       | 0.077 | 0.045 | 0.209  | 14.328  | 307.637 | 97.2   | 1.201423798 | 0.018458425   | 20.28031999 | 62.529      | 1.114       |
| 20           | 909.709  | 19       | 0.06  | 0.039 | 0.145  | 10.161  | 205.068 | 98.3   | 0.852014741 | 0.022557781   | 18.87162151 | 58.255      | 1.033       |
| 21           | 935.384  | 19       | 0.058 | 0.035 | 0.134  | 9.537   | 186.929 | 98.5   | 0.799691427 | 0.021568719   | 18.24316898 | 56.345      | 1.003       |
| 22           | 961.059  | 19       | 0.062 | 0.039 | 0.145  | 10.139  | 197.665 | 97.9   | 0.850170009 | 0.022606728   | 18.11690071 | 55.961      | 0.999       |
| 23           | 976.464  | 19       | 0.062 | 0.034 | 0.138  | 9.36    | 184.3   | 97.8   | 0.784849717 | 0.021348686   | 18.0179436  | 55.66       | 0.998       |
| 24           | 1002.139 | 19       | 0.076 | 0.044 | 0.181  | 12.887  | 266.832 | 96.9   | 1.080593836 | 0.020066367   | 19.24901252 | 59.401      | 1.068       |
| 25           | 1017.544 | 19       | 0.079 | 0.049 | 0.2116 | 15.152  | 323.832 | 97.1   | 1.270517405 | 0.019006139   | 20.11699845 | 62.034      | 1.108       |
| 26           | 1038.084 | 19       | 0.098 | 0.058 | 0.271  | 18.141  | 392.746 | 96.2   | 1.521149436 | 0.018790335   | 20.34302097 | 62.719      | 1.283       |
| 27           | 1089.434 | 13       | 0.123 | 0.083 | 0.466  | 33.93   | 787.351 | 96.8   | 2.845080225 | 0.014376773   | 22.45328582 | 69.102      | 1.231       |
| 28           | 1089.434 | 23       | 0.145 | 0.105 | 0.579  | 42.247  | 987.351 | 97.3   | 3.542472864 | 0.014606987   | 22.65899162 | 69.723      | 1.238       |
| 29           | 1089.434 | 57       | 0.286 | 0.168 | 1.142  | 81.842  | 1995.63 | 97.7   | 6.862571641 | 0.012064239   | 23.64990134 | 72.709      | 1.286       |
| 30           | 1089.434 | 117      | 0.429 | 0.233 | 1.427  | 103.478 | 2629.49 | 98.2   | 8.676781948 | 0.013233506   | 24.49990808 | 75.271      | 1.329       |
| 31           | 1192.134 | 11       | 0.227 | 0.3   | 1.451  | 106.314 | 2869.76 | 98     | 8.914584705 | 0.016584343   | 26.67226597 | 81.796      | 1.442       |
| 32           | 1243.484 | 11       | 0.329 | 0.582 | 3.644  | 273.919 | 7538.3  | 98.7   | 22.96850958 | 0.012487278   | 27.47126882 | 84.19       | 1.473       |
| 33           | 1346.184 | 11       | 0.362 | 0.389 | 4.105  | 310.528 | 8825.73 | 99     | 26.03822788 | 0.007362327   | 28.39875907 | 86.965      | 1.518       |
| 34           | 1397.534 | 11       | 0.165 | 0.057 | 0.407  | 28.729  | 869.194 | 97.7   | 2.408968753 | 0.011660608   | 29.00448586 | 88.775      | 1.565       |
| Cumulative % |          |          |       |       |        |         |         |        | 100         | Total gas age |             | 83.42993476 | 0.434390705 |

note: isotope beams in mV, rlsd = released, error in age includes J error, all errors 1 sigma  
(36Ar through 40Ar are measured beam intensities, corrected for decay for the age calculations)

Spell-UNLV, P57235 - Pakaka1, K-spar, 9.45 mg, J = 0.003960 ± 0.5%  
4 amu discrimination = 1.01817 ± 0.03%, 40/39K = 0.02163 ± 20.91%, 36/37Ca = 0.0002630 ± 0.97%, 39/37Ca = 0.0006724 ± 2.49%

| Step | T (C) | t (min.) | 36Ar  | 37Ar  | 38Ar  | 39Ar    | 40Ar     | %40Ar* | % 39Ar rlsd | Ca/K        | 40Ar*/39ArK | Age (Ma) | 1s.d. |
|------|-------|----------|-------|-------|-------|---------|----------|--------|-------------|-------------|-------------|----------|-------|
| 1    | 475   | 15       | 5.075 | 0.182 | 5.518 | 22.294  | 11398.6  | 87.3   | 0.295381012 | 0.076254107 | 447.1196733 | 1838.466 | 5.903 |
| 2    | 500   | 15       | 0.352 | 0.067 | 0.454 | 14.354  | 753.825  | 88.8   | 0.190181172 | 0.043599092 | 45.6039253  | 299.505  | 1.44  |
| 3    | 500   | 40       | 0.281 | 0.083 | 0.393 | 19.96   | 547.788  | 98     | 0.264457028 | 0.038841189 | 23.56583193 | 160.959  | 0.823 |
| 4    | 550   | 15       | 0.511 | 0.085 | 1.111 | 40.204  | 1543.762 | 91.5   | 0.532676872 | 0.019747955 | 34.83760939 | 233.149  | 1.176 |
| 5    | 550   | 40       | 0.231 | 0.094 | 0.724 | 47.389  | 809.132  | 99.8   | 0.627873453 | 0.018527747 | 15.63243713 | 108.36   | 0.54  |
| 6    | 600   | 15       | 0.484 | 0.118 | 1.585 | 78.46   | 2084.746 | 94.1   | 1.03954401  | 0.014047707 | 24.86172272 | 169.407  | 0.824 |
| 7    | 600   | 40       | 0.211 | 0.126 | 1.057 | 79.552  | 1184.683 | 99.8   | 1.054012301 | 0.014794192 | 14.04256109 | 97.632   | 0.489 |
| 8    | 650   | 15       | 0.484 | 0.152 | 1.569 | 90.288  | 1961.312 | 93.7   | 1.196257324 | 0.015724813 | 20.22913276 | 139.023  | 0.685 |
| 9    | 650   | 40       | 0.192 | 0.117 | 1.243 | 94.919  | 1434.042 | 99.9   | 1.257615064 | 0.011513413 | 14.39993281 | 100.049  | 0.496 |
| 10   | 700   | 15       | 0.358 | 0.143 | 1.591 | 100.264 | 1999.44  | 95.7   | 1.32843284  | 0.013321792 | 18.96195712 | 130.622  | 0.648 |
| 11   | 700   | 40       | 0.196 | 0.123 | 1.158 | 89.423  | 1350.361 | 99.7   | 1.184796636 | 0.012847761 | 14.33380439 | 99.602   | 0.5   |
| 12   | 750   | 15       | 0.278 | 0.136 | 1.26  | 83.713  | 1548.263 | 95.9   | 1.109142847 | 0.015174622 | 17.58311198 | 121.436  | 0.595 |
| 13   | 800   | 15       | 0.818 | 0.224 | 2.867 | 166.839 | 3278.04  | 93.2   | 2.210508325 | 0.012540705 | 18.27706071 | 126.065  | 0.62  |
| 14   | 850   | 15       | 0.44  | 0.216 | 2.598 | 181.62  | 3019.974 | 96.3   | 2.406346969 | 0.011108653 | 15.96768064 | 110.614  | 0.547 |
| 15   | 900   | 15       | 0.281 | 0.223 | 2.453 | 182.838 | 2797.991 | 97.7   | 2.422484677 | 0.011392257 | 14.89575154 | 103.397  | 0.51  |
| 16   | 925   | 15       | 0.15  | 0.16  | 1.603 | 125.582 | 1829.085 | 98.6   | 1.663879887 | 0.011900468 | 14.25527044 | 99.071   | 0.492 |
| 17   | 950   | 15       | 0.167 | 0.175 | 1.546 | 116.237 | 1715.126 | 98.2   | 1.54006471  | 0.014062592 | 14.37640875 | 99.89    | 0.494 |
| 18   | 975   | 15       | 0.225 | 0.185 | 1.634 | 120.657 | 1827.549 | 97.4   | 1.598626837 | 0.014321581 | 14.64432102 | 101.7    | 0.506 |
| 19   | 990   | 15       | 0.188 | 0.167 | 1.386 | 103.609 | 1576.862 | 97.7   | 1.372751917 | 0.01505535  | 14.73245035 | 102.295  | 0.509 |
| 20   | 1015  | 15       | 0.27  | 0.195 | 1.695 | 121.253 | 1914.707 | 96.8   | 1.60652345  | 0.015021523 | 15.18570112 | 105.352  | 0.52  |
| 21   | 1030  | 15       | 0.264 | 0.196 | 1.577 | 114.391 | 1840.484 | 96.8   | 1.51560641  | 0.016004282 | 15.46185291 | 107.212  | 0.528 |
| 22   | 1045  | 15       | 0.315 | 0.204 | 1.669 | 116.994 | 1955.565 | 96.2   | 1.550094468 | 0.016286906 | 15.9779498  | 110.683  | 0.545 |
| 23   | 1060  | 15       | 0.363 | 0.223 | 1.969 | 129.935 | 2239.391 | 96     | 1.721554308 | 0.016030634 | 16.46969175 | 113.984  | 0.561 |
| 24   | 1075  | 15       | 0.439 | 0.262 | 2.298 | 152.708 | 2711.378 | 95.9   | 2.023281758 | 0.016025496 | 16.96830943 | 117.325  | 0.575 |
| 25   | 1085  | 15       | 0.442 | 0.271 | 2.586 | 163.75  | 2959.682 | 96.2   | 2.169581082 | 0.015458234 | 17.33962562 | 119.809  | 0.588 |
| 26   | 1095  | 15       | 0.472 | 0.303 | 2.798 | 183.266 | 3325.687 | 96.4   | 2.428155399 | 0.015443034 | 17.44809734 | 120.534  | 0.592 |
| 27   | 1100  | 20       | 0.56  | 0.371 | 3.594 | 233.51  | 4225.441 | 97     | 3.093855746 | 0.014840217 | 17.49194724 | 120.827  | 0.593 |
| 28   | 1100  | 25       | 0.549 | 0.379 | 3.635 | 240.414 | 4309.123 | 97.1   | 3.18532926  | 0.014724863 | 17.35174237 | 119.89   | 0.588 |
| 29   | 1100  | 40       | 0.677 | 0.463 | 4.47  | 295.149 | 5279.462 | 96.5   | 3.910532438 | 0.014652491 | 17.26888067 | 119.336  | 0.586 |
| 30   | 1100  | 60       | 0.664 | 0.454 | 4.419 | 297.66  | 5324.129 | 98.4   | 3.943801557 | 0.014246465 | 17.29609957 | 119.518  | 0.586 |
| 31   | 1100  | 75       | 0.613 | 0.422 | 3.599 | 243.934 | 4436.147 | 99     | 3.231966972 | 0.016158912 | 17.51275225 | 120.966  | 0.595 |
| 32   | 1100  | 75       | 0.514 | 0.297 | 2.568 | 174.842 | 3256.487 | 99.7   | 2.316542874 | 0.015866555 | 17.83341179 | 123.107  | 0.604 |
| 33   | 1100  | 75       | 0.468 | 0.247 | 2.051 | 136.37  | 2590.954 | 100    | 1.806813876 | 0.016918046 | 18.06939405 | 124.681  | 0.617 |
| 34   | 1100  | 75       | 0.437 | 0.225 | 1.637 | 111.945 | 2167.364 | 99.8   | 1.483198499 | 0.018773712 | 18.14244934 | 125.168  | 0.616 |
| 35   | 1100  | 90       | 0.477 | 0.204 | 1.702 | 113.187 | 2232.001 | 99.2   | 1.499654192 | 0.016834713 | 18.41339101 | 126.973  | 0.625 |
| 36   | 1100  | 120      | 0.589 | 0.224 | 1.893 | 126.671 | 2557.317 | 99.8   | 1.678308429 | 0.016517445 | 18.40332905 | 126.906  | 0.626 |
| 37   | 1150  | 20       | 0.21  | 0.188 | 0.905 | 56.348  | 1161.195 | 96.6   | 0.746574381 | 0.031164008 | 19.56034346 | 134.594  | 0.668 |
| 38   | 1200  | 15       | 0.369 | 0.398 | 2.087 | 132.763 | 2687.748 | 96.7   | 1.75902347  | 0.028001388 | 19.48388996 | 134.087  | 0.656 |
