# Supplementary material
Source: publisher figshare collection journal article supplement (https://geolsoc.figshare.com/articles/dataset/_/3454127)
Supplement: Supplementary file 1 [file 1 › 18886_2015-021_7.pdf]

## SUPPLEMENTARY FILE 7 R6865 XRF data

R6865 wr

|                                  |       |
|----------------------------------|-------|
| SiO <sub>2</sub> (wt%)           | 66.98 |
| TiO <sub>2</sub>                 | 0.65  |
| Al <sub>2</sub> O <sub>3</sub>   | 14.79 |
| Fe <sub>2</sub> O <sub>3</sub> T | 4.18  |
| MnO                              | 0.08  |
| MgO                              | 0.83  |
| CaO                              | 3.14  |
| Na <sub>2</sub> O                | 3.21  |
| K <sub>2</sub> O                 | 3.85  |
| P <sub>2</sub> O <sub>5</sub>    | 0.33  |
| LOI                              | 0.44  |
| Majors total                     | 98.48 |

|          |     |
|----------|-----|
| As (ppm) | 2   |
| Ba       | 736 |
| Ce       | 126 |
| Cr       | 12  |
| Cu       | 45  |
| Ga       | 20  |
| La       | 64  |
| Nb       | 12  |
| Ni       | 46  |
| Pb       | 34  |
| Rb       | 169 |
| Sc       | 6   |
| Sr       | 157 |
| Th       | 6   |
| U        | 3   |
| V        | 35  |
| Y        | 36  |
| Zn       | 60  |
| Zr       | 284 |

Whole rock crushed in WC ring mill  
Analysed by Spectrachem Analytical  
Job SA17713  
Analysis date January 9, 2014
